# Supplementary material for: Metagenomic Insights into Microbial Community Structure, Function, and Salt Adaptation in Saline Soils of Arid Land, China
Source: MDPI journal article supplement (doi:10.3390/microorganisms10112183), 2022-11-03
Supplement: s1 [file s1]

Table S1. Location of sampling sites.

| Geographic site index | Longitude and latitude |         | Altitude (m) | Location        |
|-----------------------|------------------------|---------|--------------|-----------------|
| ABH                   | 83°14'E                | 44°37'N | 172          | Xinjiang, China |
| ALK                   | 82°35'E                | 45°11'N | 219          | Xinjiang, China |
| BJT                   | 85°6'E                 | 44°40'N | 208          | Xinjiang, China |
| YSJ                   | 86°14'E                | 44°59'N | 290          | Xinjiang, China |
| FKC                   | 88°6'E                 | 44°16'N | 428          | Xinjiang, China |
| CWP                   | 87°52'E                | 43°31'N | 1,039        | Xinjiang, China |
| KMS                   | 88°24'E                | 42°5'N  | 732          | Xinjiang, China |
| HSB                   | 86°42'E                | 42°16'N | 997          | Xinjiang, China |
| HJC                   | 86°13'E                | 42°8'N  | 1,070        | Xinjiang, China |
| ZNQ                   | 86°19'E                | 41°50'N | 984          | Xinjiang, China |
| TMG                   | 85°23'E                | 41°50'N | 835          | Xinjiang, China |
| KCB                   | 83°9'E                 | 41°28'N | 916          | Xinjiang, China |
| KPB                   | 78°58'E                | 40°27'N | 1,108        | Xinjiang, China |
| BCB                   | 78°30'E                | 39°53'N | 1,069        | Xinjiang, China |
