# Supplementary material for: Metagenomic Insights into Microbial Community Structure, Function, and Salt Adaptation in Saline Soils of Arid Land, China
Source: MDPI journal article supplement (doi:10.3390/microorganisms10112183), 2022-11-03
Supplement: s1 [file s1]

Table S4. The gene number and Shannon diversity index of microbial communities in each geographic site.

| Samples     | Gene numbers                                  | Shannon index   |                |
|-------------|-----------------------------------------------|-----------------|----------------|
|             |                                               | genus           | phylum         |
| HSB         | 3,138,591 ± 1,637,517                         | 5.97 ± 0.28     | 1.75 ± 0.47    |
| TMG         | 2,652,630 ± 296,530                           | 5.83 ± 0.16     | 1.12 ± 0.20    |
| HJC         | 4,242,615 ± 515,197                           | 6.59 ± 0.28     | 2.05 ± 0.29    |
| ZNQ         | 4,032,477 ± 338,532                           | 5.51 ± 0.78     | 1.61 ± 0.29    |
| KCB         | 2,044,519 ± 512,919                           | 6.34 ± 0.23     | 1.69 ± 0.28    |
| KMS         | 2,996,114 ± 106,623                           | 5.04 ± 0.10     | 0.61 ± 0.18    |
| BCB         | 2,981,616 ± 478,957                           | 6.10 ± 0.23     | 1.62 ± 0.41    |
| ABH         | 921,921 ± 31,897                              | 7.26 ± 0.33     | 2.73 ± 0.18    |
| ALK         | 2,300,766 ± 14,746                            | 7.51 ± 0.26     | 3.07 ± 0.11    |
| KPB         | 3,278,915 ± 470,829                           | 6.72 ± 0.18     | 2.47 ± 0.11    |
| BJT         | 3,533,709 ± 78,992                            | 6.43 ± 0.10     | 2.18 ± 0.07    |
| CWP         | 2,813,323 ± 143,735                           | 7.03 ± 0.08     | 2.70 ± 0.06    |
| FKC         | 2,697,890 ± 61,692                            | 6.05 ± 0.04     | 2.13 ± 0.02    |
| YSJ         | 3,009,692 ± 402,483                           | 6.10 ± 0.09     | 2.19 ± 0.06    |
| Total Mean  | 2,916,391 ± 920,460                           | 6.32 ± 0.70     | 1.99 ± 0.67    |
| Saline      | 2.544×10 <sup>6</sup> ± 850,819a              | 6.78 ± 0.593a   | 2.548 ± 0.081a |
| hypersaline | 3.07×10 <sup>6</sup> ± 1.08×10 <sup>6</sup> a | 5.977 ± 0.115 b | 1.577 ± 0.111b |

Values in Mean ± Std. Deviation, n=3.

Different lowercase letters represents significant difference between saline and hypersaline soils ( $p < 0.05$ ).
